# Supplementary material for: Silk fibroin directs the formation of monetite nanocrystals and their assembly into hierarchical composites
Source: Royal Society of Chemistry journal article supplement (doi:10.1039/d1tb01821c), 2021-01-01
Supplement: d1tb01821c1.pdf [file d1tb01821c1.pdf]

Supporting Information

## **Silk fibroin directs the formation monetite nanocrystals and their assembly into hierarchical composites**

Ying Huang<sup>1</sup>, Hao Xie<sup>2</sup>, Weijian Fang<sup>1</sup>, Zhaoyong Zou<sup>1,\*</sup>, Zhengyi Fu<sup>1,\*</sup>

<sup>1</sup> State Key Laboratory of Advanced Technology for Materials Synthesis and Processing, Wuhan University of Technology, Wuhan, 430070, China

<sup>2</sup>School of Chemistry, Chemical Engineering, and Life Science, Wuhan University of Technology, Wuhan, 430070, China

Corresponding author: [zyfu@whut.edu.cn](mailto:zyfu@whut.edu.cn) (Z. Fu); [zzou@whut.edu.cn](mailto:zzou@whut.edu.cn) (Z. Zou)

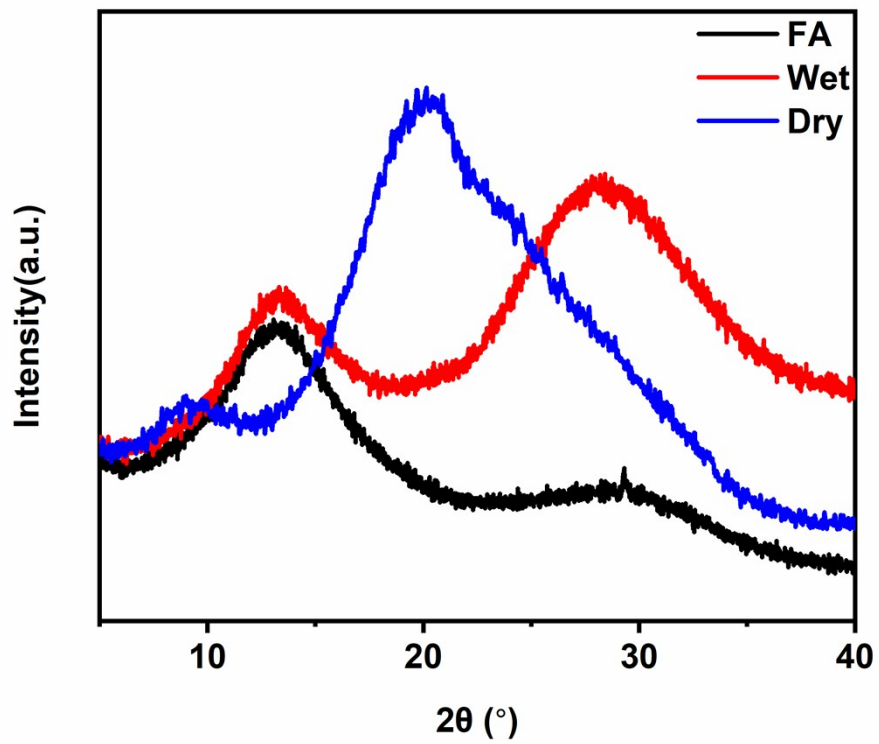

**Figure S1.** XRD patterns of SF film before (FA) and after immersion in diH<sub>2</sub>O (wet) and after freeze drying (dry).

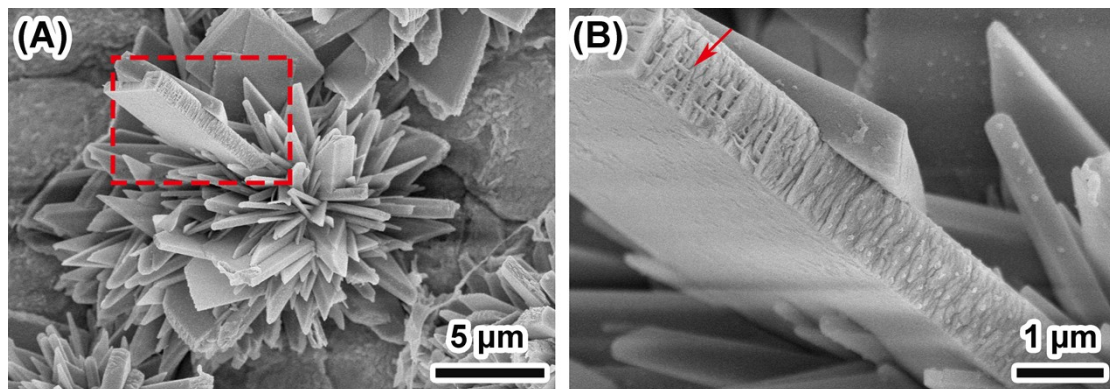

**Figure S2.** SEM images of samples obtained in the calcium phosphate precursor solution with a calcium concentration of 0.84 M.

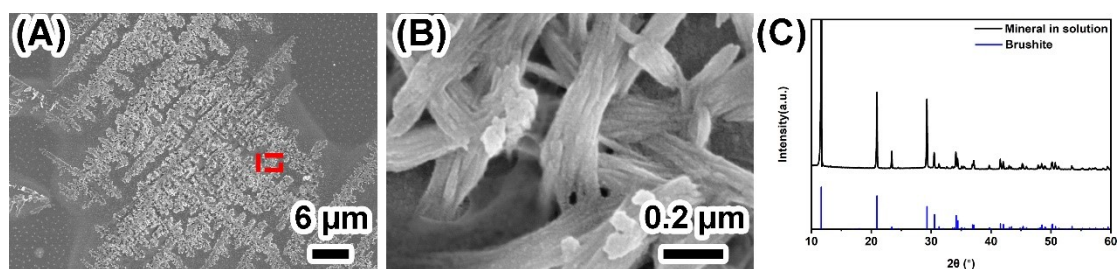

**Figure S3.** (A, B) SEM images of the sample obtained in the precursor solution after removal of the silk film and (C) the corresponding XRD pattern.

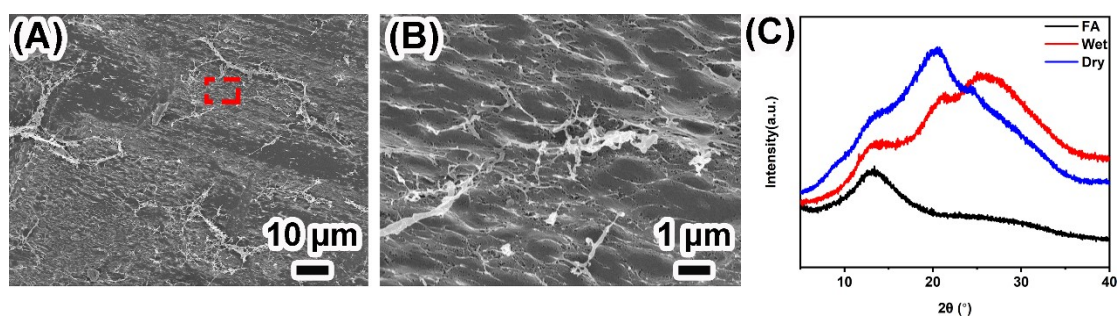

**Figure S4.** (A, B) SEM images of the silk film treated with ethanol vapor after freeze drying; (C) XRD patterns of SF film before (FA) immersion in diH<sub>2</sub>O and after immersion in diH<sub>2</sub>O followed with ethanol vapor treatment (wet) and after freeze drying (dry).

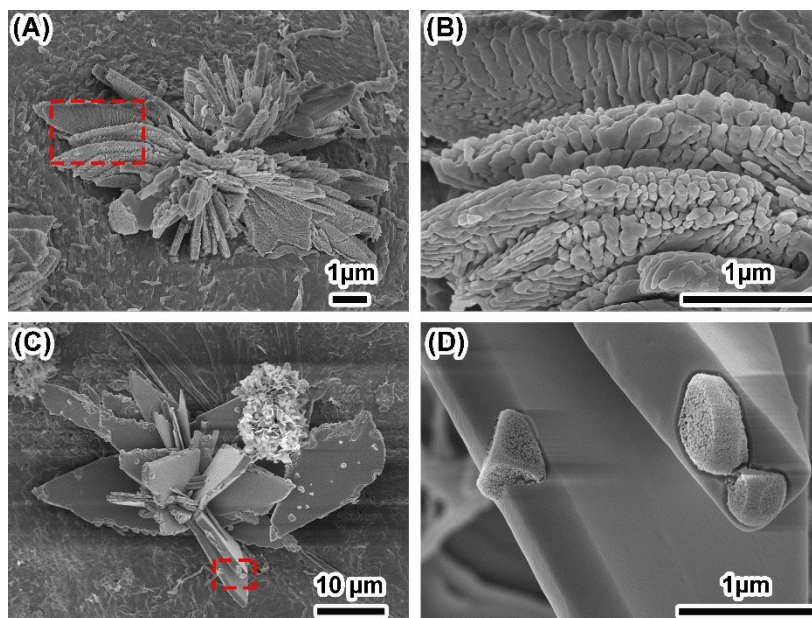

**Figure S5.** SEM images of the sample after mineralization for 4 h (A, B) and 24 h (C, D) in the presence of ethanol treated silk film.



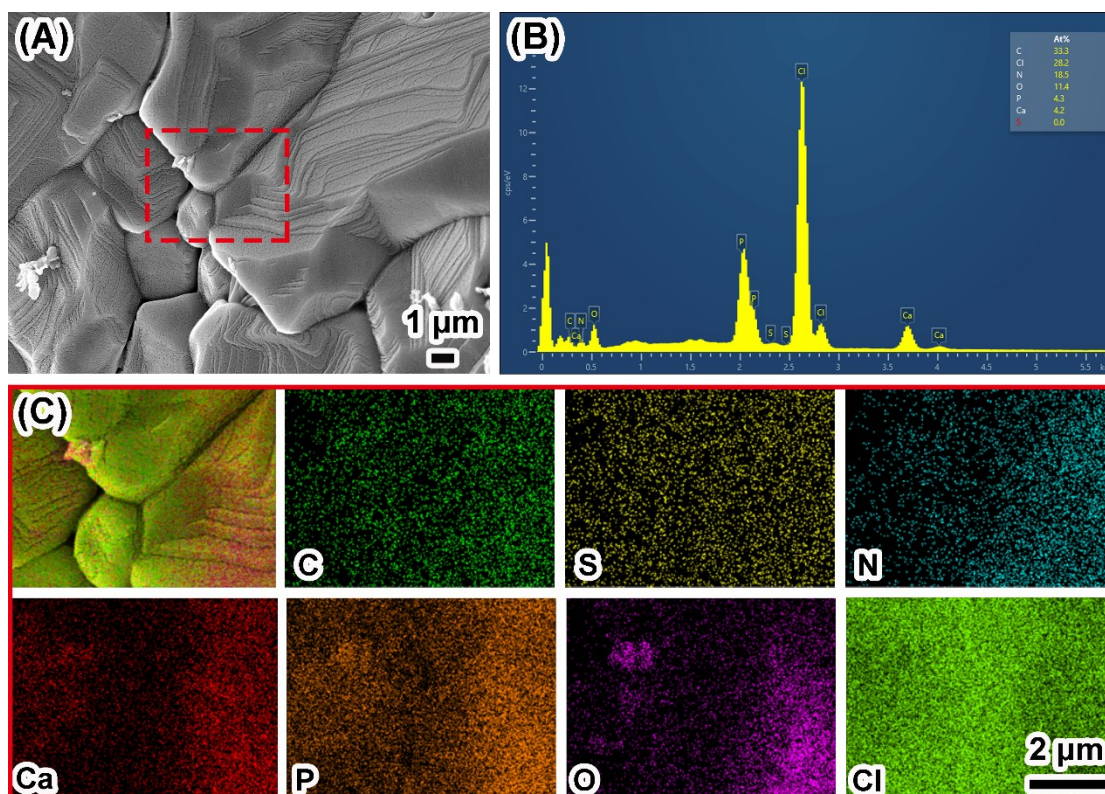

**Figure S6.** (A) SEM image and (B) the corresponding EDS spectrum and (C) EDS mapping of the sample after pretreatment in precursor solution for 7 days.

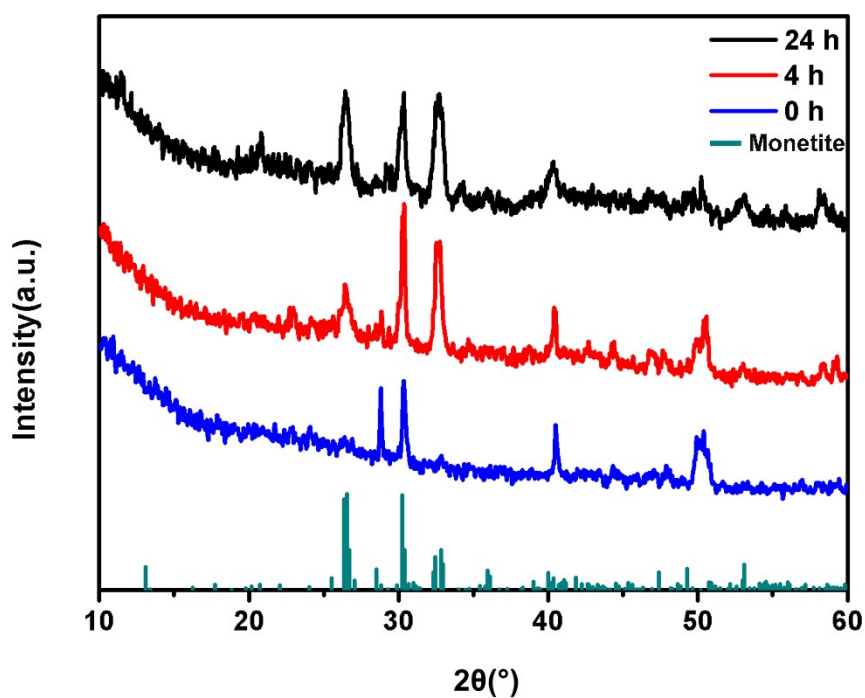

**Figure S7.** XRD patterns of the samples before mineralization (0 h) and after mineralization for 4 h and 24 h.

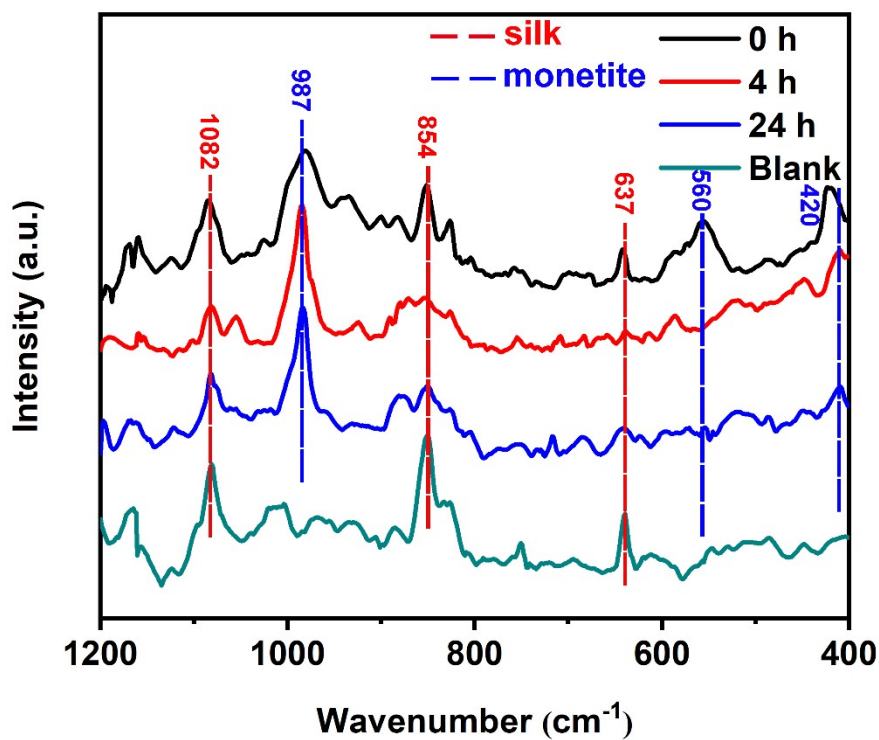

**Figure S8.** Raman spectrum of the silk film (blank) and samples after mineralization for 0 h, 4 h and 24 h.

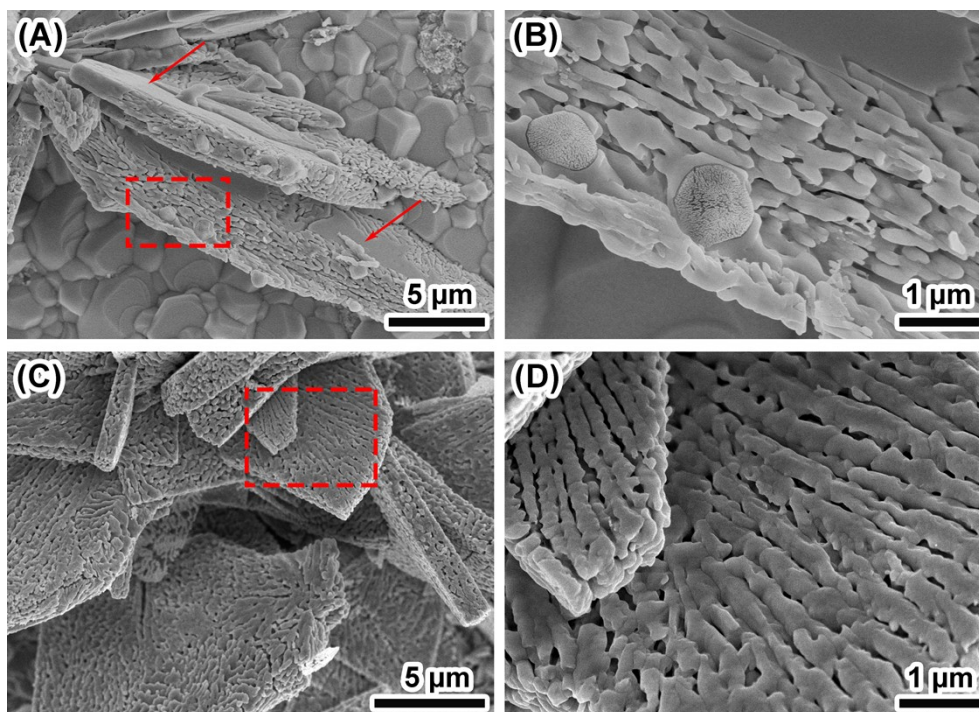

**Figure S9.** SEM images of the samples collected during the mineralization process. (A-B) shows that presence of humps within the crystals. Part of the crystal surface become smooth, as indicated by arrows.



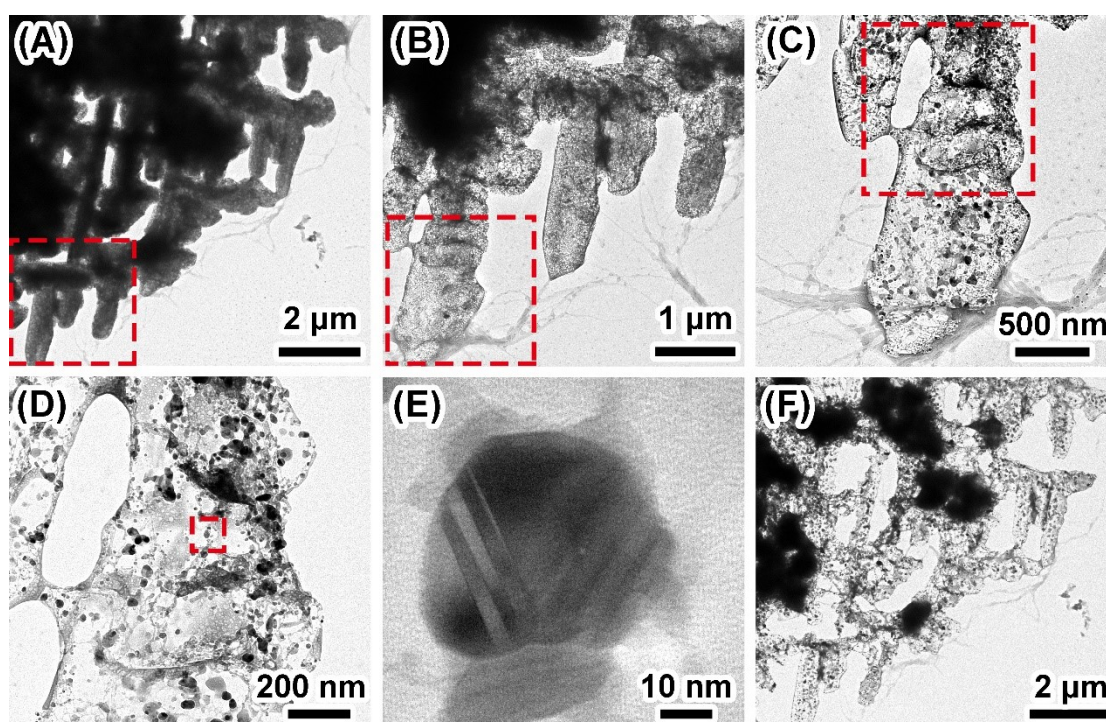

**Figure S10.** Consecutive TEM images (A-E) with increasing magnification for a sample collected during the mineralization process. (F) Zoomed out TEM images of the sample after beam damage.

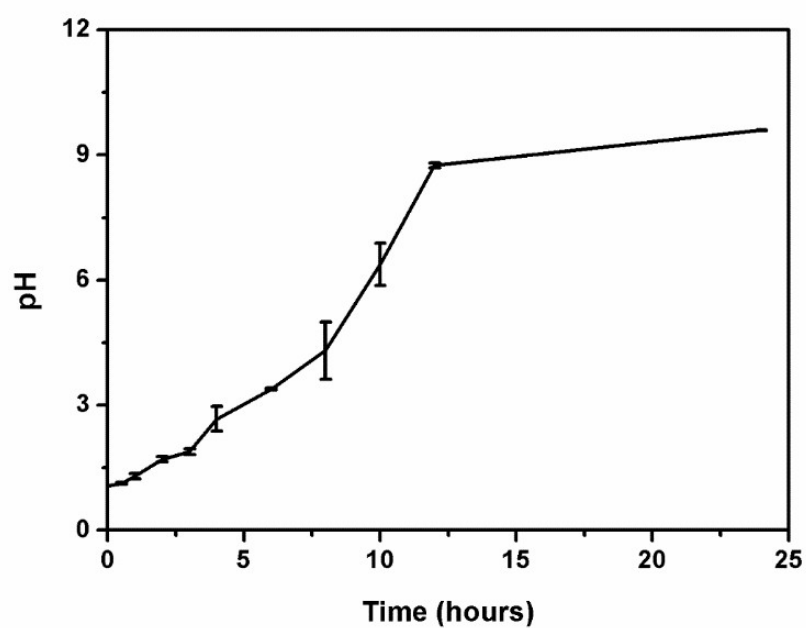

**Figure S11.** pH changes of the precursor solution during mineralization.

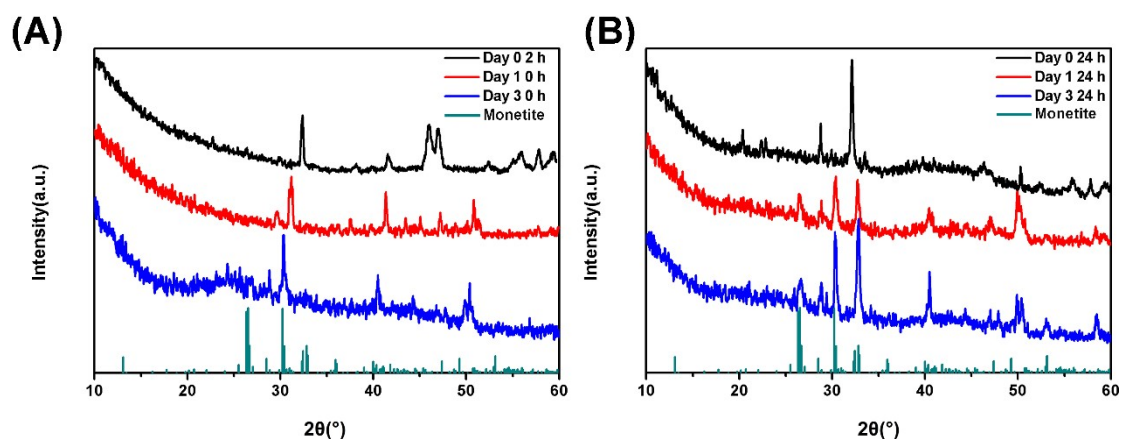

**Figure S12.** (A) XRD pattern of silk film without pretreatment in calcium phosphate solution and mineralized for 2 h, and silk film treated with calcium phosphate solution for 1 day and 3 days before mineralization. (B) XRD pattern of silk film without pretreatment in calcium phosphate solution and silk film treated with calcium phosphate solution for 1 day and 3 days mineralized for 24 h.

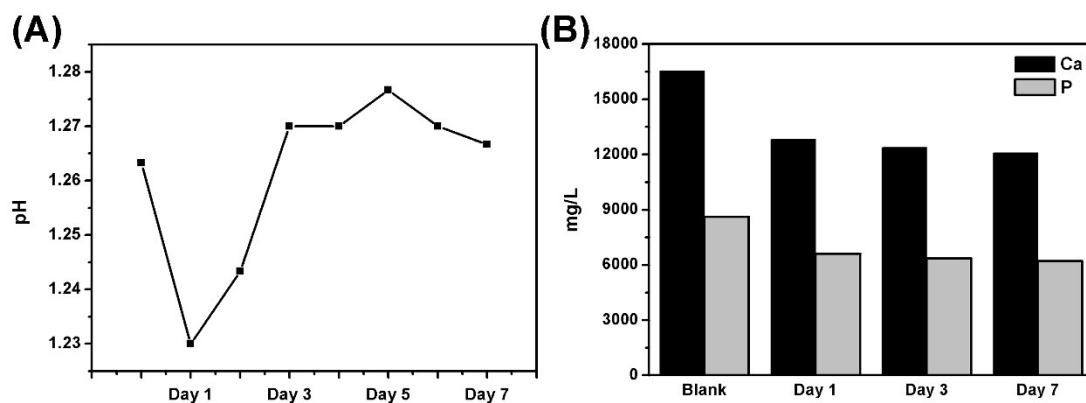

**Figure S13.** (A) pH change of the precursor solution before mineralization; (B) the amount changes of Ca and P ratio with time in precursor solution before mineralization.
